# Supplementary material
Source: HighWire-hosted journal article supplement (https://www.annfammed.org/highwire/filestream/14171/field_highwire_adjunct_files/0/Beach.pdf)
Supplement: Beach.pdf [file Beach.pdf]

## Supplemental materials for

Beach M, Park J, Han D, Evans C, Moore RD, Saha S. Clinician response to patient emotion: impact on subsequent communication and visit length. *Ann Fam Med*. 2021;19(6):515-520.

| <b>Supplemental Table 1. Description of Study Participants, Encounters and Emotional Expressions</b> |                     |
|------------------------------------------------------------------------------------------------------|---------------------|
| <b>Clinician Characteristics (n = 41)</b>                                                            |                     |
| Age, mean (SD)                                                                                       | 45.7 (10.3)         |
| Gender, n (%)                                                                                        |                     |
| Male                                                                                                 | 14 (34.1%)          |
| Female                                                                                               | 27 (65.9%)          |
| Race, n (%)                                                                                          |                     |
| White/Caucasian                                                                                      | 27 (65.9%)          |
| Black/African American                                                                               | 6 (14.6%)           |
| Hispanic/Latino                                                                                      | 2 (4.9%)            |
| Asian                                                                                                | 4 (9.8%)            |
| Other                                                                                                | 2 (4.9%)            |
| Patients/Clinician, Mean (Range)                                                                     | 8.3 (2-10)          |
| <b>Patient Characteristics (n = 342)</b>                                                             |                     |
| Age, mean (SD)                                                                                       | 53.2 (10.2)         |
| Gender, n (%)                                                                                        |                     |
| Male                                                                                                 | 218 (63.7%)         |
| Female                                                                                               | 124 (36.3%)         |
| Race, n (%)                                                                                          |                     |
| White/Caucasian                                                                                      | 69 (20.2%)          |
| Black/African American                                                                               | 262 (76.6%)         |
| Asian                                                                                                | 2 (0.6%)            |
| Other                                                                                                | 9 (2.6%)            |
| <b>Visit Characteristics (n = 342)</b>                                                               |                     |
| Length in minute, mean (range; SD)                                                                   | 30.4 (9.5-75; 11.9) |

|                                                                                          |                       |
|------------------------------------------------------------------------------------------|-----------------------|
| At least 1 emotional expression, n (%)                                                   | 228 (66.7%)           |
| Mean (range; SD) emotional expressions                                                   | 3 (0-24; 3.7)         |
| Mean (range; SD) emotional expressions among visits with at least 1 emotional expression | 4.5 (1-24; 3.6)       |
| <b>Emotional Expressions Characteristics (n = 1028)</b>                                  |                       |
| Intensity, n (%) concerns                                                                | 278 (27.0%)           |
| Unique emotional expression, n (%)                                                       | 524 (51.0%)           |
| Same emotional expression repeated subsequently, n (%)                                   | 504 (49.0%)           |
| Same emotional expression repeated subsequently after 60 seconds, n (%)                  | 166 (32.9%)           |
| Time of emotional expression in minutes, mean (range, SD)                                | 10.1 (0.05-40.6; 9.2) |

| Supplemental Table 2. Distribution of Clinician Responses to Patient Emotional Expressions                         |                           |                                                                                                                        |                                                                                                                                                         |              |
|--------------------------------------------------------------------------------------------------------------------|---------------------------|------------------------------------------------------------------------------------------------------------------------|---------------------------------------------------------------------------------------------------------------------------------------------------------|--------------|
| Broad Response Types                                                                                               |                           | Hypothetical Responses, by Type^<br>Patient – “I’m just so lonely”                                                     | Definition                                                                                                                                              | n (%)        |
| Non-explicit - Reduces Space                                                                                       |                           | “Did you get your flu shot this year”<br>“You should join an HIV support group”                                        | Does not specifically reference the patient’s emotional circumstance; does <u>not</u> provide space in the conversation for the patient to elaborate    | 73<br>(7%)   |
| Non-explicit - Provides Space                                                                                      |                           | “I’m so sorry to hear that”<br>“Tell me more”<br>“Mmm-hmm, I see”                                                      | Does <u>not</u> specifically reference the patient’s emotional circumstance; <u>does</u> provide space in the conversation for the patient to elaborate | 504<br>(49%) |
| Explicit - Reduces Space                                                                                           |                           | “You shouldn’t be lonely, you have lots of friends”<br>“You might feel less alone if went out with friends more often” | <u>Does</u> specifically reference the patient’s emotional circumstance; does <u>not</u> provide space in the conversation for the patient to elaborate | 127<br>(12%) |
| Explicit - Provides Space                                                                                          |                           | “When did you start feeling lonely?”<br>“It’s hard to be alone”                                                        | <u>Does</u> specifically reference the patient’s emotional circumstance; <u>does</u> provides space in the conversation for the patient to elaborate    | 324<br>(32%) |
| Specific Response Types*                                                                                           |                           |                                                                                                                        |                                                                                                                                                         |              |
| Provide<br>s Space                                                                                                 | Any empathy               | “I am so sorry to hear that”                                                                                           | Expressed explicit or non-explicit verbal empathy (NPIIm, EPAEm)                                                                                        | 51<br>(5%)   |
|                                                                                                                    | Explicit focus on emotion | “It’s hard to be alone”<br>“When did you start feeling lonely?”<br>“I’m sorry it’s been such a hard time”              | Focused explicitly on the emotion by acknowledging it, asking about it, or providing explicit empathy (EPAAc, EPAEx, EPAEm)                             | 38<br>(4%)   |
|                                                                                                                    | Acknowledgment            | “You’ve been through so much loss”<br>“Divorce is just so hard”                                                        | Acknowledged the emotion or circumstance (NPAC, EPCAc, EPAAc)                                                                                           | 205<br>(20%) |
|                                                                                                                    | Exploring                 | “Tell me more about that”<br>“When did your partner move out?”                                                         | Explored the emotional issue by asking the patient for more information (NPAi, EPCex, EPAEx)                                                            | 225<br>(22%) |
|                                                                                                                    | Neutral/ passive          | “Mmmm-hmmm”<br>“I see”                                                                                                 | Was passive by giving silence, back-channeling, or providing non-explicit acknowledgment (NPSi, NPBC, NPAc)                                             | 435<br>(42%) |
| Reduce<br>s Space                                                                                                  | Information/<br>advice    | “You should join an HIV support group”                                                                                 | Gave information or advice (NRIa, ERIa)                                                                                                                 | 128<br>(12%) |
|                                                                                                                    | Blocking                  | “Did you get your flu shot this year?”<br>“You shouldn’t be lonely, you have lots of friends”                          | Actively tried to avoid the emotional expression (NRIg, NRSd, ERSw, ERAb)                                                                               | 66<br>(6%)   |
| ^Examples to demonstrate different responses, by type, to a hypothetical patient expression                        |                           |                                                                                                                        |                                                                                                                                                         |              |
| *Not mutually exclusive and therefore totals do not add to 100% and some examples are shown in multiple categories |                           |                                                                                                                        |                                                                                                                                                         |              |

| Supplemental Table 3. Associations of Timing of Patient Emotional Expression with Clinician Responses |                           |                                                                                                                                                                                       |                                                 |
|-------------------------------------------------------------------------------------------------------|---------------------------|---------------------------------------------------------------------------------------------------------------------------------------------------------------------------------------|-------------------------------------------------|
| Types of Clinician Response                                                                           |                           | Hypothetical Examples to patient expression <i>"I'm just so lonely"</i> <sup>^</sup>                                                                                                  | Odds of Response Type* with Each Passing Minute |
| Broad Response Types                                                                                  |                           |                                                                                                                                                                                       | OR (95%CI)                                      |
| <b>Non-Explicit</b> - Does not explicitly mention or repeat the emotional circumstance in response    |                           | <i>"I'm so sorry to hear that"</i><br><i>"Tell me more"</i><br><i>"Mmm-hmm, I see"</i><br><i>"Did you get your flu shot this year"</i>                                                | ref                                             |
| <b>Explicit</b> - Does explicitly mention the emotional circumstance in response                      |                           | <i>"It's hard to be <u>alone</u>"</i><br><i>"When did you start feeling <u>lonely</u>?"</i><br><i>"You might feel less <u>alone</u> if you went out with your friends more often"</i> | <b>1.02 (1.00, 1.03)</b>                        |
| <b>Reduce space</b> for the patient to elaborate on emotional issue                                   |                           | <i>"Did you get your flu shot this year"</i><br><i>"You should join an HIV support group"</i><br><i>"You shouldn't be lonely, you have lots of friends"</i>                           | ref                                             |
| <b>Provides space</b> for the patient to elaborate on emotional issue                                 |                           | <i>"When did you start feeling lonely?"</i><br><i>"It's hard to be alone"</i><br><i>"Tell me more"</i><br><i>"Mmm-hmm, I see"</i>                                                     | <b>0.96 (0.94, 0.98)</b>                        |
| Specific Response Types                                                                               |                           | Hypothetical Responses, by Type <sup>^</sup>                                                                                                                                          |                                                 |
| Provides Space                                                                                        |                           |                                                                                                                                                                                       |                                                 |
|                                                                                                       | Empathy                   | <i>"I am so sorry to hear that"</i>                                                                                                                                                   | 0.98 (0.95, 1.02)                               |
|                                                                                                       | Explicit focus on emotion | <i>"It's hard to be alone"</i><br><i>"When did you start feeling lonely?"</i>                                                                                                         | 1.03 (1.00, 1.06)                               |
|                                                                                                       | Acknowledgment            | <i>"You've been through so much loss"</i><br><i>"Divorce is just so hard"</i>                                                                                                         | 1.01 (0.99, 1.03)                               |
|                                                                                                       | Exploring                 | <i>"Tell me more about that"</i><br><i>"When did your partner move out?"</i>                                                                                                          | 0.99 (0.97, 1.01)                               |
|                                                                                                       | Neutral/passive           | <i>"Mmmm-hmmm"</i><br><i>"I see"</i>                                                                                                                                                  | <b>0.98 (0.96, 0.99)</b>                        |

|                                                                                                                                                                                                                                                                                                                                 |                             |                                                                                                             |                          |
|---------------------------------------------------------------------------------------------------------------------------------------------------------------------------------------------------------------------------------------------------------------------------------------------------------------------------------|-----------------------------|-------------------------------------------------------------------------------------------------------------|--------------------------|
| Reduces Space                                                                                                                                                                                                                                                                                                                   |                             |                                                                                                             |                          |
|                                                                                                                                                                                                                                                                                                                                 | Gives advice or information | <i>"You should join an HIV support group"</i><br><i>"I'd like to prescribe an antidepressant"</i>           | <b>1.05 (1.02, 1.07)</b> |
|                                                                                                                                                                                                                                                                                                                                 | Blocking                    | <i>"Did you get your flu shot this year?"</i><br><i>"You shouldn't be lonely, you have lots of friends"</i> | <b>1.03 (1.00, 1.05)</b> |
| <b>^Examples to demonstrate different responses, by type, to a hypothetical patient expression – "I'm just so lonely"</b><br><b>*Random intercept univariate multilevel logistic regression models (account for clustering of emotional expressions within patient encounters and of patient encounters within clinicians).</b> |                             |                                                                                                             |                          |
